# Supplementary material
Source: PubMed Central journal article supplement (PMC5355887)
Supplement: ja6b12079_si_001.pdf [file ja6b12079_si_001.pdf]

**Supporting Information:**  
**Reduced Acid Dissociation of Amino-Acids at the  
Surface of Water**

Simona Strazdaite,<sup>\*</sup> Konrad Meister, and Huib J. Bakker<sup>\*</sup>

*FOM Institute Amolf, Science park 102, Amsterdam 1098 XG, The Netherlands*

E-mail: strazdaite@amolf.nl; bakker@amolf.nl

---

<sup>\*</sup>To whom correspondence should be addressed

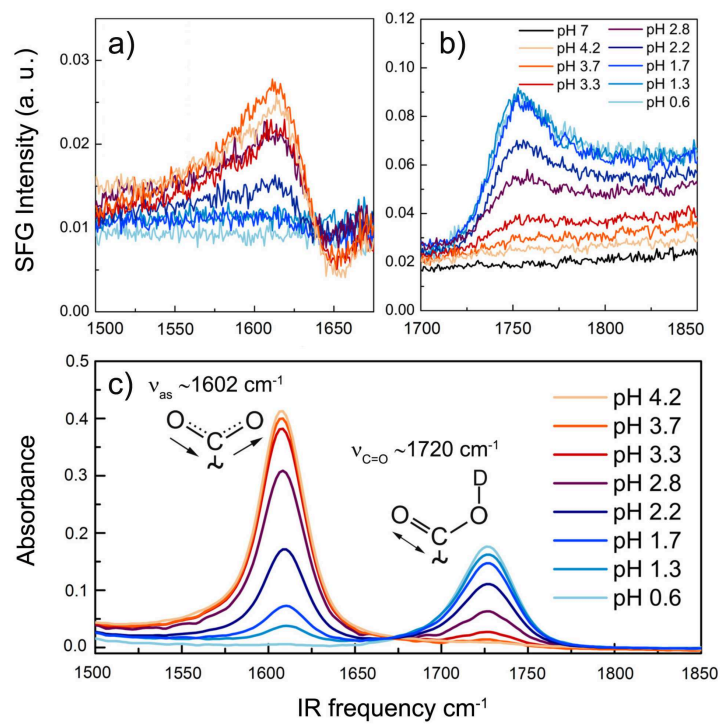

Figure S1: VSF spectra of L-alanine in the frequency regions of the  $\nu_{\text{AS,COO}^-}$  (a) and the  $\nu_{\text{COOD}}$  (b) vibrations. ATR spectra in the region 1500 - 1850  $\text{cm}^{-1}$  (c).

## Fitting L-alanine VSFG Spectra

Table 1: Fitting parameters for the L-alanine in  $\nu_{\text{COOD}}$  and  $\nu_{\text{AS,COO}^-}$  vibrational regions.

| pH  | $\nu_{\text{COOD}}$<br>$\omega_0=1740 \text{ cm}^{-1}$<br>$\Gamma=17 \text{ cm}^{-1}$ |                       |                 | $\nu_{\text{AS,COO}^-}$<br>$\omega_0=1630 \text{ cm}^{-1}$<br>$\Gamma=18 \text{ cm}^{-1}$ |                       |                 |
|-----|---------------------------------------------------------------------------------------|-----------------------|-----------------|-------------------------------------------------------------------------------------------|-----------------------|-----------------|
|     | $A_{\text{NR}}$                                                                       | $\varphi_{\text{NR}}$ | $A_{\text{R}}$  | $A_{\text{NR}}$                                                                           | $\varphi_{\text{NR}}$ | $A_{\text{R}}$  |
| 0.6 | $0.18 \pm 0.01$                                                                       | $7 \pm 1$             | $2.6 \pm 0.1$   | –                                                                                         | $– \pm 2$             | –               |
| 1.3 | $0.17 \pm 0.01$                                                                       | $6 \pm 1$             | $2.7 \pm 0.1$   | $0.12 \pm 0.01$                                                                           | $141 \pm 16$          | $0.08 \pm 0.01$ |
| 1.7 | $0.17 \pm 0.01$                                                                       | $4 \pm 1$             | $2.45 \pm 0.04$ | $0.10 \pm 0.01$                                                                           | $162 \pm 1$           | $0.22 \pm 0.01$ |
| 2.3 | $0.16 \pm 0.01$                                                                       | $10 \pm 1$            | $2.18 \pm 0.04$ | $0.11 \pm 0.01$                                                                           | $170 \pm 2$           | $0.44 \pm 0.02$ |
| 2.8 | $0.15 \pm 0.01$                                                                       | $9 \pm 1$             | $1.38 \pm 0.04$ | $0.11 \pm 0.01$                                                                           | $178 \pm 1$           | $0.83 \pm 0.02$ |
| 3.3 | $0.12 \pm 0.01$                                                                       | $2 \pm 1$             | $0.82 \pm 0.03$ | $0.12 \pm 0.01$                                                                           | $181 \pm 1$           | $1.14 \pm 0.02$ |
| 3.7 | $0.10 \pm 0.01$                                                                       | $5 \pm 1$             | $0.43 \pm 0.05$ | $0.11 \pm 0.01$                                                                           | $191 \pm 1$           | $1.38 \pm 0.02$ |
| 4.2 | –                                                                                     | –                     | –               | 0.11                                                                                      | 170                   | $1.43 \pm 0.02$ |

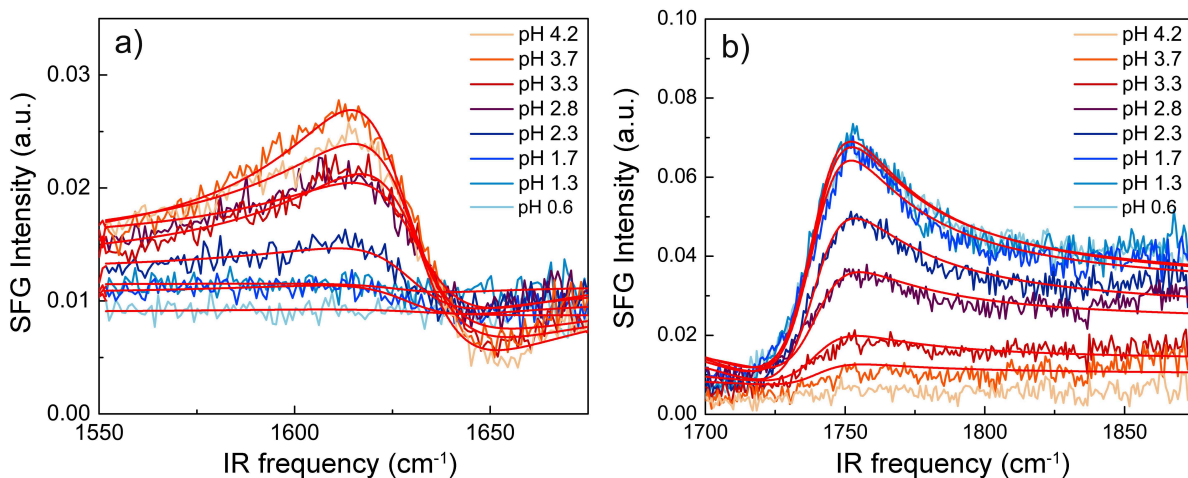

Figure S2: VSFG spectra of L-alanine in the frequency regions of the  $\nu_{\text{AS,COO}^-}$  (a) and the  $\nu_{\text{COOD}}$  (b) vibrations.

## Fitting L-alanine ATR Spectra

Table 2: Fitting parameters for the L-alanine ATR spectra.

|     | $\omega_0 = 1515 \text{ cm}^{-1}$<br>$\Gamma = 140 \text{ cm}^{-1}$ | $\omega_0 = 1608 \text{ cm}^{-1}$<br>$\Gamma = 30 \text{ cm}^{-1}$ | $\omega_0 = 1727 \text{ cm}^{-1}$<br>$\Gamma = 40 \text{ cm}^{-1}$ |
|-----|---------------------------------------------------------------------|--------------------------------------------------------------------|--------------------------------------------------------------------|
| pH  | Peak Area                                                           | Peak Area                                                          | Peak Area                                                          |
| 7   | $9.8 \pm 0.4$                                                       | $20.8 \pm 0.2$                                                     | $0.4 \pm 0.1$                                                      |
| 4.2 | $9.4 \pm 0.4$                                                       | $19.8 \pm 0.1$                                                     | $0.6 \pm 0.1$                                                      |
| 3.7 | $9.5 \pm 0.3$                                                       | $19.4 \pm 0.1$                                                     | $1.1 \pm 0.1$                                                      |
| 3.3 | $9.2 \pm 0.3$                                                       | $18.5 \pm 0.1$                                                     | $1.9 \pm 0.1$                                                      |
| 2.8 | $8.6 \pm 0.3$                                                       | $14.9 \pm 0.4$                                                     | $4.2 \pm 0.1$                                                      |
| 2.3 | $7.2 \pm 0.2$                                                       | $8.4 \pm 0.1$                                                      | $7.5 \pm 0.2$                                                      |
| 1.7 | $7.1 \pm 0.3$                                                       | $3.5 \pm 0.1$                                                      | $9.9 \pm 0.1$                                                      |
| 1.3 | $7.3 \pm 0.3$                                                       | $1.8 \pm 0.08$                                                     | $11.0 \pm 0.1$                                                     |
| 0.6 | $5.9 \pm 0.3$                                                       | $0.5 \pm 0.08$                                                     | $12 \pm 0.1$                                                       |

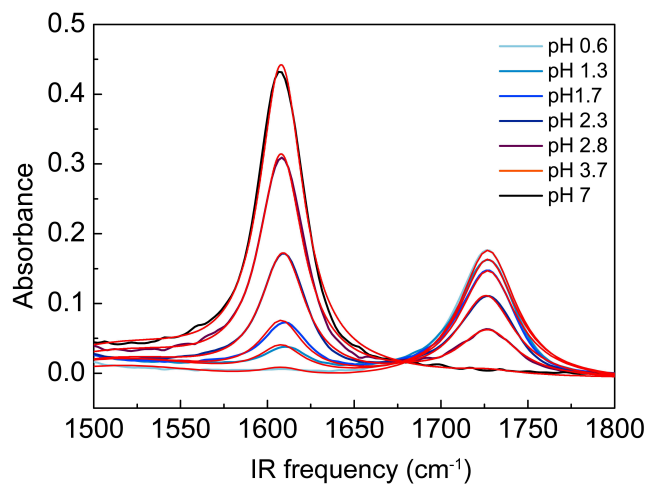

Figure S3: Experimentally measured ATR spectra of L-alanine and Lorentzian model fits.

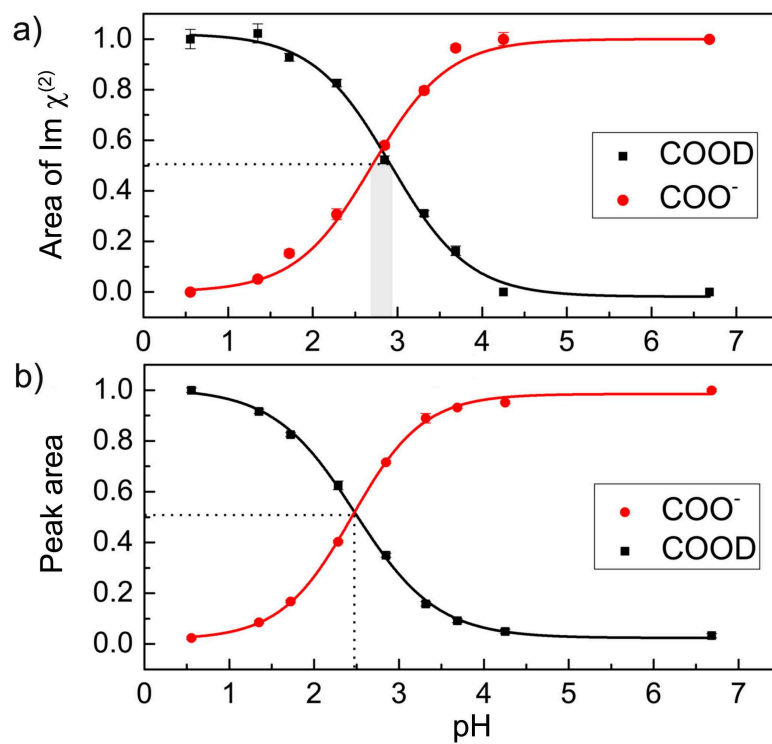

Figure S4: pH dependence of the peak areas of the  $\nu_{AS,COO^-}$  and  $\nu_{COOD}$  vibrations obtained from fitting the VSG (a) and ATR (b) spectra of L-alanine.
